# Supplementary material for: Environmental Assessment of Friable Asbestos from Soil to Air Using the Releasable Asbestos Sampler (RAS)
Source: MDPI journal article supplement (doi:10.3390/toxics10120748), 2022-12-01
Supplement: s1 [file s1]

## Supplementary materials

Table S1. Data compilation of friable asbestos concentrations of tested soil in the two study areas.

| Mine name  | Asbestos in soils (%) | Wind velocity (m/s) | Friable asbestos in air (f/cc) |                      |
|------------|-----------------------|---------------------|--------------------------------|----------------------|
|            |                       |                     | 10~20% water content           | 20~30% water content |
| Jecheon    | 0.25                  | 0                   | 0.002                          | 0.001                |
|            |                       | 1                   | 0.003                          | 0.001                |
|            |                       | 2                   | 0.003                          | 0.001                |
|            |                       | 3                   | 0.005                          | 0.001                |
|            |                       | 5                   | 0.013                          | 0.003                |
|            | 0.50                  | 0                   | 0.005                          | 0.002                |
|            |                       | 1                   | 0.006                          | 0.002                |
|            |                       | 2                   | 0.011                          | 0.009                |
|            |                       | 3                   | 0.010                          | 0.009                |
|            |                       | 5                   | 0.018                          | 0.017                |
|            | 0.75                  | 0                   | 0.010                          | 0.004                |
|            |                       | 1                   | 0.010                          | 0.006                |
|            |                       | 2                   | 0.007                          | 0.008                |
|            |                       | 3                   | 0.017                          | 0.009                |
|            |                       | 5                   | 0.031                          | 0.013                |
| Jongmin-ri | 0.25                  | 0                   | 0.002                          | 0.003                |
|            |                       | 1                   | 0.005                          | 0.003                |
|            |                       | 2                   | 0.006                          | 0.003                |
|            |                       | 3                   | 0.007                          | 0.003                |
|            |                       | 5                   | 0.023                          | 0.009                |
|            | 0.50                  | 0                   | 0.009                          | 0.006                |
|            |                       | 1                   | 0.027                          | 0.053                |
|            |                       | 2                   | 0.032                          | 0.040                |
|            |                       | 3                   | 0.105                          | 0.089                |
|            |                       | 5                   | 0.400                          | 0.282                |
|            | 0.75                  | 0                   | 0.013                          | 0.007                |
|            |                       | 1                   | 0.121                          | 0.120                |
|            |                       | 2                   | 0.163                          | 0.173                |
|            |                       | 3                   | 0.223                          | 0.132                |
|            |                       | 5                   | 0.471                          | 0.185                |

Table S2. Calculated ELCR value as asbestos concentration in soils from the Jecheon mine.

| Asbestos<br>in soil(%) | Scenarios | Wind velocity<br>(m/s) | Calculated ELCR      |                      |
|------------------------|-----------|------------------------|----------------------|----------------------|
|                        |           |                        | 10~20% water content | 20~30% water content |
| 0.25                   | Weeding   | 0                      | 3.89E-06             | 1.95E-06             |
|                        |           | 1                      | 5.84E-06             | 1.95E-06             |
|                        |           | 2                      | 5.84E-06             | 1.95E-06             |
|                        |           | 3                      | 9.73E-06             | 1.95E-06             |
|                        |           | 5                      | 2.53E-05             | 5.84E-06             |
|                        | Digging   | 0                      | 3.41E-06             | 1.71E-06             |
|                        |           | 1                      | 5.12E-06             | 1.71E-06             |
|                        |           | 2                      | 5.12E-06             | 1.71E-06             |
|                        |           | 3                      | 8.53E-06             | 1.71E-06             |
|                        |           | 5                      | 2.22E-05             | 5.12E-06             |
| 0.50                   | Weeding   | 0                      | 9.73E-06             | 3.89E-06             |
|                        |           | 1                      | 1.17E-05             | 3.89E-06             |
|                        |           | 2                      | 2.14E-05             | 1.75E-05             |
|                        |           | 3                      | 1.95E-05             | 1.75E-05             |
|                        |           | 5                      | 3.50E-05             | 3.31E-05             |
|                        | Digging   | 0                      | 8.53E-06             | 3.41E-06             |
|                        |           | 1                      | 1.02E-05             | 3.41E-06             |
|                        |           | 2                      | 1.88E-05             | 1.53E-05             |
|                        |           | 3                      | 1.71E-05             | 1.53E-05             |
|                        |           | 5                      | 3.07E-05             | 2.90E-05             |
| 0.75                   | Weeding   | 0                      | 1.95E-05             | 7.79E-06             |
|                        |           | 1                      | 1.95E-05             | 1.17E-05             |
|                        |           | 2                      | 1.36E-05             | 1.56E-05             |
|                        |           | 3                      | 3.31E-05             | 1.75E-05             |
|                        |           | 5                      | 6.03E-05             | 2.53E-05             |
|                        | Digging   | 0                      | 1.71E-05             | 6.82E-06             |
|                        |           | 1                      | 1.71E-05             | 1.02E-05             |
|                        |           | 2                      | 1.19E-05             | 1.36E-05             |
|                        |           | 3                      | 2.90E-05             | 1.53E-05             |
|                        |           | 5                      | 5.29E-05             | 2.22E-05             |

Table S3. Calculated ELCR value as asbestos concentration in soils from the Jonmin-ri mine.

| Asbestos<br>in soil(%) | Scenarios | Wind velocity<br>(m/s) | Calculated ELCR        |                        |
|------------------------|-----------|------------------------|------------------------|------------------------|
|                        |           |                        | 10~20% water content   | 20~30% water content   |
| 0.25                   | Weeding   | 0                      | 6.07E-06               | 9.10E-06               |
|                        |           | 1                      | 1.52E-05               | 9.10E-06               |
|                        |           | 2                      | 1.82E-05               | 9.10E-06               |
|                        |           | 3                      | 2.12E-05               | 9.10E-06               |
|                        |           | 5                      | 6.98E-05               | 2.73E-05               |
|                        | Digging   | 0                      | 2.71E-06               | 4.07E-06               |
|                        |           | 1                      | 6.78E-06               | 4.07E-06               |
|                        |           | 2                      | 8.14E-06               | 4.07E-06               |
|                        |           | 3                      | 9.49E-06               | 4.07E-06               |
|                        |           | 5                      | 3.12E-05               | 1.22E-05               |
| 0.50                   | Weeding   | 0                      | 2.73E-05               | 1.82E-05               |
|                        |           | 1                      | 8.19E-05               | <b><u>1.61E-04</u></b> |
|                        |           | 2                      | 9.70E-05               | <b><u>1.21E-04</u></b> |
|                        |           | 3                      | <b><u>3.18E-04</u></b> | <b><u>2.70E-04</u></b> |
|                        |           | 5                      | <b><u>1.21E-03</u></b> | <b><u>8.55E-04</u></b> |
|                        | Digging   | 0                      | 1.22E-05               | 8.14E-06               |
|                        |           | 1                      | 3.66E-05               | 7.19E-05               |
|                        |           | 2                      | 4.34E-05               | 5.42E-05               |
|                        |           | 3                      | <b><u>1.42E-04</u></b> | <b><u>1.21E-04</u></b> |
|                        |           | 5                      | <b><u>5.42E-04</u></b> | <b><u>3.82E-04</u></b> |
| 0.75                   | Weeding   | 0                      | 3.94E-05               | 2.12E-05               |
|                        |           | 1                      | <b><u>3.67E-04</u></b> | <b><u>3.64E-04</u></b> |
|                        |           | 2                      | <b><u>4.94E-04</u></b> | <b><u>5.25E-04</u></b> |
|                        |           | 3                      | <b><u>6.76E-04</u></b> | <b><u>4.00E-04</u></b> |
|                        |           | 5                      | <b><u>1.43E-03</u></b> | <b><u>5.61E-04</u></b> |
|                        | Digging   | 0                      | 1.76E-05               | 9.49E-06               |
|                        |           | 1                      | <b><u>1.64E-04</u></b> | <b><u>1.63E-04</u></b> |
|                        |           | 2                      | <b><u>2.21E-04</u></b> | <b><u>2.35E-04</u></b> |
|                        |           | 3                      | <b><u>3.02E-04</u></b> | <b><u>1.79E-04</u></b> |
|                        |           | 5                      | <b><u>6.39E-04</u></b> | <b><u>2.51E-04</u></b> |

Letters in bold and underline are over the guideline (1.00E-04) of ELCR.
